# Supplementary material for: Changes in local mineral homeostasis facilitate the formation of benign and malignant testicular microcalcifications
Source: eLife. 2025 Apr 25;13:RP95545. doi: 10.7554/eLife.95545 (PMC12029210; doi:10.7554/eLife.95545)
Supplement: Figure 1—source data 1. [file elife-95545-fig1-data1.xlsx]

## Sheet: Fig 1E
BGLAP				SLC34A1				SLC34A2
NT	SCO	GCNIS		NT	SCO	GCNIS		NT	SCO	GCNIS
1.32754	3.25183	1.1007		1.2417	0.6284	0.1507		0.624843	0.049689	0.078976
1.80094	0.88041	0.96845		0.8555	0.4421	0.2176		1.77962	0.008984	0.091923
0.44097	3.39581	0.07629		2.1248	5.0449	0.0564		0.018409	0.067995	0.02668
1.32295	0.16667	0.09271		0.4632	0.0312	0.0259		1.48871	0.06521	0.019235
0.1076		0.01948		0.3148		1.3171		1.08842		0.114883
		0.02632				16.7644				0.165538
		0.06247				0.1003				0.091056
		0.27076				19.1906				1.20572
		0.32955				0.0199				0.523732
		0.09619				0.0965				0.008139
		0.19265				0.8161				0.090208
		1.739				1.0923				0.391043
		1.99827				2.3102				0.240077
		1.84517				0.0895				0.422561
		3.45516				0.5143				0.126663
		0.11802				0.0348				0.094071
		0.35876				4.831				0.014347
		15.603				1.4639				1.14597
		3.21263				0.606				0.140055
		0.17407				0.5904				0.212652
		1.91024				0.4146				0.17423
		1.35778				0.134				0.127103
		0.95844				1.2877				0.019799
		1.73058				0.0223				0.41511
		0.10453				0.2077				0.007917
		0.27799				8.1248				0.030531
		21.8378				15.6417				0.046846
		31.7515				5.142				0.927594
		4.86943								0.17975
