# Supplementary material for: Changes in local mineral homeostasis facilitate the formation of benign and malignant testicular microcalcifications
Source: eLife. 2025 Apr 25;13:RP95545. doi: 10.7554/eLife.95545 (PMC12029210; doi:10.7554/eLife.95545)
Supplement: Figure 2—source data 1. [file elife-95545-fig2-data1.xlsx]

## Sheet: Fig 2A
NANOG						POU5F1						FGF23
NT	SCO	GCNIS	SEM	EC +/- T		NT	SCO	GCNIS	SEM	EC +/- T		NT	SCO	GCNIS	SEM	EC +/- T
0.1344	0.1746	1.0134	1.6434	3.327		0.0218	0.01544	0.84407	1.53202	3.98735		1.22009	0.714243	0.890068	0.145288	27.1332
0.4031	0.1629	0.6721	2.0093	32.9391		0.05499	0.01577	0.76867	2.44601	41.8		1.39909	0.465543	1.03311	0.394197	2.94239
0.077	0.2291	0.1954	5.2935	2.9368		0.04467	0.01296	0.31326	5.73754	4.74179		0.380769	3.08333	1.37505	1.24789	7.4358
0.3807		0.3103	0.8289	4.871		0.05386		0.0623	1.25304	40.2365		1.52308	0.365892	0.128246	0.485313	3.90951
4.0048		18.5292	2.8664	32.0939		4.82467		23.4324	4.62814	61.6245		0.476976	0.238902	0.0477614	2.06621	5.42449
		1.7798	10.0682	1.4992				2.64897	6.49996	2.80001				1.21587	0.0135975	5.46222
		12.0147						3.6186						0.384749	0.466351	160.284
		1.1906						0.32318						1.15428	2.08058	131.78
		1.7523						9.03442						0.142052	0.0594157	0.483634
		2.5083						4.92605						0.865729	0.122596	0.113596
		1.968						1.82821						0.297712	0.220215
		1.0187						0.10885						1.58226	4.10388
		0.2054						0.18887						1.88164	0.41812
		0.0814						0.03505						0.890068
		1.3653						2.37913						8.17936
		1.2348						3.61233						1.06215
		0.2797						0.50189						0.674546
		0.3962						0.04649						0.37358
		1.849						1.06469						1.43842
		0.9926						0.30681						0.268313
		3.0881						2.31407						0.166603
		1.0656						0.78482						0.177327
														0.640375
														0.0911564
														1.39183
														0.057791
														0.383417
														0.13208
														2.52623
														0.69351

## Sheet: Fig 2B
POUSF1	FGF23		NANOG	FGF23
0.05517	7.39e-05		0.03263	7.39e-05
0.57834	0.0001866		0.32309	0.0001866
0.06561	9.81e-05		0.02881	9.81e-05
0.55671	0.0001362		0.04778	0.0001362
0.85263	0.004023		0.3148	0.004023
0.03874	2.9e-06		0.01471	2.9e-06

## Sheet: Fig 2D
NT	hESC1/SSEA-3+/46XX	hESC1/SSEA-3+/47XX+del	hESC1 unsorted	NTera2
1.22	31.97	42.53	40.23	51.76
1.4			24.88	54.64
0.38
1.52
0.48

## Sheet: Fig 2G
	iFGF23																					iFGF23+cFGF23
Healthy	0	0	0	0	0	0	0	0	0	0	0	0	0	0	0	0	0	0	0			1	1.7	1	0.3	0	0	1.7	0.3	1	0	0	0	0	0	0	0	0	0	0.3
GCNIS	0	0	2.4	0	0	5	0															5	4.3	0.3	0.3	2.3	0	11.2
EC	0	0	0	2.9	0.3	0	0	0	0	0												15	13.8	2.8	0.3	0.3	4.3	2	2.3	0	1.7
