# Supplementary material for: Changes in local mineral homeostasis facilitate the formation of benign and malignant testicular microcalcifications
Source: eLife. 2025 Apr 25;13:RP95545. doi: 10.7554/eLife.95545 (PMC12029210; doi:10.7554/eLife.95545)
Supplement: Figure 3—source data 1. [file elife-95545-fig3-data1.xlsx]

## Sheet: Fig 3B
Control	NTera2 xenograft
10.8	42.4
25	34
6.1	39.2
6.8	46.4
1.7	43.4
7.1

## Sheet: Fig 3C
	Control						NTera2 xenograft
Slc34a1	0.18	0.48	0.97	0.28	3.36		0.73	5.38	1.16	2.9	4.81	3.08
Slc34a2	0.343	0.577	0.663	0.899	2.823		0.695	2.167	0.81	2.813	4.286	0.613
Bglap	1.2	1.38	1.28	1.01	0.64		0.5	1.93	2.03	2.14	4.79	1.63

## Sheet: Fig 3D
	Vehicle						iFGF23						cFGF23
SLC34A1	ND	ND	ND	ND	ND		ND	ND	ND	ND			ND	ND	ND	ND
SLC34A2	0.28091	2.34593	1.03706	0.88199	0.45412		0.58838	0.87853	0.22126	2.73807			0.54481	1.15949	1.03275	1.52467
BGLAP	0.23487	1.33248	1.92312	1.18382	0.3257		0.26507	5.72437	0.55323	0.65223			1.25277	0.58417	1.1682	0.10493
