# Supplementary material for: Changes in local mineral homeostasis facilitate the formation of benign and malignant testicular microcalcifications
Source: eLife. 2025 Apr 25;13:RP95545. doi: 10.7554/eLife.95545 (PMC12029210; doi:10.7554/eLife.95545)
Supplement: Figure 4—source data 1. [file elife-95545-fig4-data1.xlsx]

## Sheet: Fig 4A
Serum calcium			Serum Pi
WT	Fgf23-/-		WT	Fgf23-/-
9.3343	9.64912		8.46352	11.7006
9.15284	11.3098		8.2038	12.0424
9.17346	10.7008		7.59379	11.218
9.69449	9.70274		9.39989	10.619
9.3618	10.4094		8.66942	12.7464
9.29856	11.0692		9.86636	12.5994
9.30131			8.43875
9.39204			8.74802

## Sheet: FIg 4D
	Vehicle											High phosphate diet
Abcc6	0.878754	1.07614	0.852949	1.1018	0.978876	0.972789	0.928645	1.13409	0.945532	1.13043		1.00849	1.01997	0.999676	1.06575	1.11383	1.05521	0.789603	0.884254
Enpp1	1.6333	1.38651	0.857251	0.691334	0.718863	1.35923	0.820432	0.89655	0.854778	0.781755		0.942864	0.547067	0.530389	0.726544	0.947669	0.909485	0.66042	0.558304
Slc34a2	1.0538	1.15316	1.01743	0.98028	0.85397	0.97249	0.94317	0.87252	0.83312	1.32005		0.91632	1.04628	0.92419	0.89892	0.96321	1.15583	0.74325	0.64585
Slc34a1	ND	ND	ND	ND	ND	ND	ND	ND	ND	ND		ND	ND	ND	ND	ND	ND	ND	ND
Bglap	ND	ND	ND	ND	ND	ND	ND	ND	ND	ND		ND	ND	ND	ND	ND	ND	ND	ND
