# Supplementary material for: Changes in local mineral homeostasis facilitate the formation of benign and malignant testicular microcalcifications
Source: eLife. 2025 Apr 25;13:RP95545. doi: 10.7554/eLife.95545 (PMC12029210; doi:10.7554/eLife.95545)
Supplement: Figure 5—source data 1. [file elife-95545-fig5-data1.xlsx]

## Sheet: Fig 5B
Slc20a1					Slc34a2					Slc34a1					Bglap
WT	hpg	hpg.SCARKO	hpg.ARKO		WT	hpg	hpg.SCARKO	hpg.ARKO		WT	hpg	hpg.SCARKO	hpg.ARKO		WT	hpg	hpg.SCARKO	hpg.ARKO
0.78	1.23	0.27	0.63		0.87	1.06	0.3	0.6		0.47	239.55	141.21	133.82		ND	ND	0.08	2.44
1.13	0.45	0.79	0.27		0.85	0.35	0.7	0.22		1.56	133.13	360.59	477.45		ND	ND	0.24	0.22
1.01	0.52	0.89	0.56		1.05	0.55	0.92	0.7		1.41	253.65	497.72			ND	ND	0.07	0.33
1.08	0.47				1.23	0.41				0.57	485.79				ND	ND
