# Supplementary material for: Changes in local mineral homeostasis facilitate the formation of benign and malignant testicular microcalcifications
Source: eLife. 2025 Apr 25;13:RP95545. doi: 10.7554/eLife.95545 (PMC12029210; doi:10.7554/eLife.95545)
Supplement: Figure 6—source data 1. [file elife-95545-fig6-data1.xlsx]

## Sheet: Fig 6B
ALPP	ALPP	ALPP	ALPP2	ALPP2	ALPP2	ALPI	ALPI	ALPI	ALPL	ALPL	ALPL
Normal testis	GCNIS + mikrolithiasis	Seminoma	Normal testis	GCNIS + mikrolithiasis	Seminoma	Normal testis	GCNIS + mikrolithiasis	Seminoma	Normal testis	GCNIS + mikrolithiasis	Seminoma
1.02805	1.67119	0.37086	1.81543	1.44838	1.24508	1.76786	4.06031	0.915335	1.6233	1.48506	3.28236
1.029	0.833977	1.67491	0.33618	2.71347	4.30837	0.435881	0.524436	3.40484	0.757734	1.70341	1.31706
0.942946	1074.22	0.118908	0.848395	51.0076	0.304808	0.796257	269.662	0.282653	0.618965	138.458	0.681988
