# Supplementary material for: Changes in local mineral homeostasis facilitate the formation of benign and malignant testicular microcalcifications
Source: eLife. 2025 Apr 25;13:RP95545. doi: 10.7554/eLife.95545 (PMC12029210; doi:10.7554/eLife.95545)
Supplement: Figure 7—source data 1. [file elife-95545-fig7-data1.xlsx]

## Sheet: Fig 7B
	Vehicle									Osteogenic differentiation media								Osteogenic differentiation media + 2 mM phosphate								Osteogenic differentiation media + 4 mM phosphate								Osteogenic differentiation media + 8 mM phosphate
Bglap	2.1514	1.0281	0.2075	1.0783	2.5268	0.2874	0.105	0.6156		0.9073	0.2023	0.1611	0.2973					0.7488	0.1686	0.1428	0.3242					0.5167	0.8961	6.3774						0.5571	1.094	0.0853	0.764
Runx2	0.9379	0.9611	1.5105	1.1642	1.7273	0.8031	0.3273	0.5686		0.6145	1.3538	0.2782	0.7814					1.4523	1.3425	0.4132	0.958					0.6451	1.0386	0.6935						1.4643	0.3768	1.0617	0.5225
Alpl	0.25335	0.55698	2.07994	1.24909	1.92146	0.28014	0.44551	1.21353		2.55656	3.61469	0.61808	10.3284					0.67076	1.10793	0.1229	4.16372					0.45836	0.64627	0.65257						2.06748	1.27151	0.94597	0.95189
