# Supplementary figures and images for: Changes in local mineral homeostasis facilitate the formation of benign and malignant testicular microcalcifications
Source: eLife journal article supplement (doi:10.7554/elife.95545), 2024-07-16

Figure 1-F

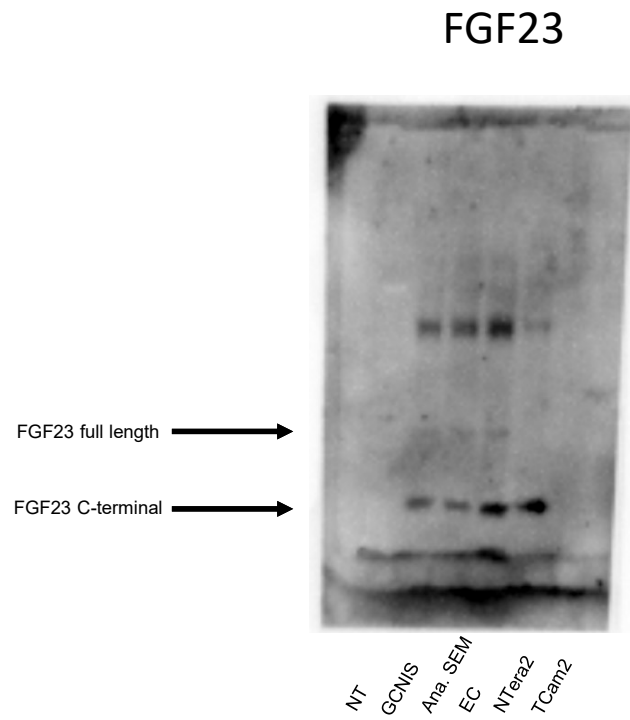

Figure 1-F

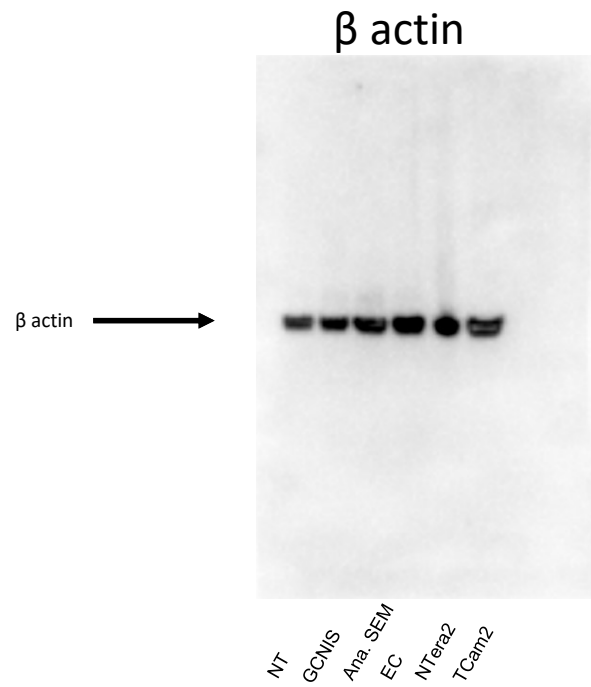

Supplement: fig2-data3 [file elife-95545-fig2-data3-v1.zip]
